# Supplementary material for: The development and validation of an Inhomogeneous Wind Scheme for Urban Street
Source: Copernicus journal article supplement (doi:10.5194/gmd-2022-267), 2023-02-13
Supplement: Supplementary file [file gmd-2022-267-AC1-supplement.zip]

# Supplement

## 1. Piecewise fitting of perpendicular scenarios

The fitting horizontal components have been mentioned in the essay. Here, the endpoints and expressions of vertical component  $w$  is shown from Table S1 to Table S3. Figure S1 shows the vertical profile of  $w$  components from IWSUS.

5

**Table S1 The fitting functions of the segmentation points for the wind components  $w$  in the perpendicular scenarios**

| Positions                    | Segmentation Points | Fitting Functions                                                                                                 |
|------------------------------|---------------------|-------------------------------------------------------------------------------------------------------------------|
| leeward at<br>entrance/exit  | H <sub>1</sub>      | $h_r = \begin{cases} -5.284 \exp(-6.065AR) + 0.9939, & AR \geq 0.5 \\ h_r(AR=0.5), & AR < 0.5 \end{cases}$        |
|                              | H <sub>2</sub>      | $h_r = 0.3585 \exp(-1.898AR) + 1.057$                                                                             |
|                              | H <sub>3</sub>      | $h_r = 1.475 \exp(-3.011AR) + 1.318$                                                                              |
| windward at<br>entrance/exit | H <sub>1</sub>      | $h_r = \begin{cases} -3.712 \exp(-5.28AR) + 0.9836, & AR \geq 0.5 \\ h_r(AR=0.5), & AR < 0.5 \end{cases}$         |
|                              | H <sub>2</sub>      | $h_r = 8.236 \exp(-5.263AR) + 1.857$                                                                              |
| leeward at<br>middle         | H <sub>1</sub>      | $h_r = 0.9$                                                                                                       |
|                              | H <sub>2</sub>      | $h_r = 0.5214 \exp(-1.5AR) + 1.055$                                                                               |
|                              | H <sub>3</sub>      | $h_r = 1.534 \exp(-2.733AR) + 1.337$                                                                              |
| windward at<br>middle        | H <sub>1</sub>      | $h_r = \begin{cases} -0.4067AR + 0.7757, & AR \geq 0.5 \\ 0.0219 \exp(-1.688AR) + 0.5214, & AR < 0.5 \end{cases}$ |
|                              | H <sub>2</sub>      | $h_r = 4.424 \exp(-4.943AR) + 1.005$                                                                              |
|                              | H <sub>3</sub>      | $h_r = 2.654 \exp(-2.872AR) + 1.73$                                                                               |

**Table S2 The fitting functions of the wind components  $w$  at the segmentation points (H<sub>i</sub>) in the perpendicular scenarios**

| Positions                   | Segmentation Points | Fitting Functions                                                                                                               |
|-----------------------------|---------------------|---------------------------------------------------------------------------------------------------------------------------------|
| leeward at<br>entrance/exit | H <sub>1</sub>      | $w_r = \begin{cases} 0.04559 \exp(2.746AR) + 0.002081, & AR < 0.5 \\ -0.3718 \exp(-5.31AR) + 0.1556, & AR \geq 0.5 \end{cases}$ |
|                             | H <sub>2</sub>      | $w_r = -0.307 \exp(-5.844AR) + 0.1185$                                                                                          |
|                             | H <sub>3</sub>      | $w_r = -0.426 \exp(-3.011AR) + 1.318$                                                                                           |
|                             | H <sub>1</sub>      | $w_r = \begin{cases} w_r(AR=0.5), & AR < 0.5 \\ -3.712 \exp(-5.28AR) + 0.9836, & AR \geq 0.5 \end{cases}$                       |

|                              |                |                                                                                                                                         |
|------------------------------|----------------|-----------------------------------------------------------------------------------------------------------------------------------------|
| windward at<br>entrance/exit | H <sub>2</sub> | $w_r = \begin{cases} w_r(\text{AR}=0.5), \text{AR} < 0.5 \\ -0.7792 \exp(-2.273\text{AR}) + 0.2835, \text{AR} \geq 0.5 \end{cases}$     |
| leeward at<br>middle         | H <sub>1</sub> | $w_r = \begin{cases} 0.5417\text{AR} + 0.0377, \text{AR} < 0.5 \\ 9.341 \exp(-8.185\text{AR}) + 0.1524, \text{AR} \geq 0.5 \end{cases}$ |
|                              | H <sub>2</sub> | $w_r = \begin{cases} 0.225\text{AR} + 0.05438, \text{AR} < 0.5 \\ 0.904 \exp(-5.519\text{AR}) + 0.1201, \text{AR} \geq 0.5 \end{cases}$ |
|                              | H <sub>3</sub> | $w_r = -0.4408 \exp(-2.875\text{AR}) + 0.5083$                                                                                          |
| windward at<br>middle        | H <sub>1</sub> | $w_r = \begin{cases} 0.2472\text{AR} + 2.858, \text{AR} < 0.5 \\ 4.77 \exp(-5.175\text{AR}) + 0.05055, \text{AR} \geq 0.5 \end{cases}$  |
|                              | H <sub>2</sub> | $w_r = 0.4383 \exp(-4.059\text{AR}) - 0.1127$                                                                                           |
|                              | H <sub>3</sub> | $w_r = -1.275 \exp(-0.6783\text{AR}) + 0.9835$                                                                                          |

10 **Table S3 Expressions of  $w$  component vertical profile for perpendicular scenarios, where the functional relations between  $w_r$  and  $h_r$  and determine functions of coefficients in these expressions are listed. The  $H_i$  and  $w_r(H_i)$  represents the relative height and relative wind components speed at the endpoints determined by Table S1 and Table S2 respectively.**

| Positions                    | Wind profile Functions                                                                                                                                                                                                                                           | Formula for Coefficients in Wind profile Functions                                                                                                                                                                                                                                                                                                                                  |
|------------------------------|------------------------------------------------------------------------------------------------------------------------------------------------------------------------------------------------------------------------------------------------------------------|-------------------------------------------------------------------------------------------------------------------------------------------------------------------------------------------------------------------------------------------------------------------------------------------------------------------------------------------------------------------------------------|
| leeward at<br>entrance/exit  | $w_r(h_r)$<br>$= \begin{cases} a_{1,1}(h_r + b_{1,1})^2 + c_{1,1}, 0 \leq h_r \leq H_1 \\ a_{1,2}h_r + b_{1,2}, H_1 \leq h_r \leq H_2 \\ a_{1,3}h_r + b_{1,3}, H_2 \leq h_r \leq H_3 \\ \frac{a_{1,4} \exp(b_{1,4}h_r)}{u_0}, h_r \geq H_3 \end{cases}$          | $\begin{cases} a_{1,1} = -\frac{c_{1,1}}{b_{1,1}^2}, b_{1,1} = -h_r(H_1), c_{1,1} = w_r(H_1) \\ a_{1,2} = \frac{w_r(H_2) - w_r(H_1)}{h_r(H_2) - h_r(H_1)}, b_{1,2} = w_r(H_2) - a_{1,2}h_r(H_2) \\ a_{1,3} = \frac{w_r(H_3) - w_r(H_2)}{h_r(H_3) - h_r(H_2)}, b_{1,3} = w_r(H_2) - a_{1,3}h_r(H_2) \\ a_{1,4} = \frac{w_r(H_3)}{\exp(b_{1,4}h_r(H_3))}, b_{1,4} = -0.1 \end{cases}$ |
| windward at<br>entrance/exit | $w_r(h_r)$<br>$= \begin{cases} a_{2,1}(h_r + b_{2,1})^2 + c_{2,1}, 0 \leq h_r \leq H_1 \\ a_{2,2}(h_r + b_{2,2})^2 + c_{2,2}, H_1 \leq h_r \leq H_2 \\ w_r(H_2), h_r \geq H_2 \end{cases}$                                                                       | $\begin{cases} a_{2,1} = -\frac{c_{2,1}}{b_{2,1}^2}, b_{2,1} = -h_r(H_1), c_{2,1} = w_r(H_1) \\ a_{2,2} = \frac{w_r(H_1) - c_{2,2}}{(h_r(H_1) + b_{2,2})^2}, b_{2,2} = -h_r(H_2), c_{2,2} = w_r(H_2) \end{cases}$                                                                                                                                                                   |
| leeward at<br>middle         | $w_r(h_r)$<br>$= \begin{cases} a_{3,1}(h_r + b_{3,1})^2 + c_{3,1}, 0 \leq h_r \leq H_1 \\ a_{3,2}h_r + b_{3,2}, H_1 \leq h_r \leq H_2 \\ a_{3,3}h_r + b_{3,3}, H_2 \leq h_r \leq H_3 \\ \frac{a_{3,4} \exp(b_{3,4}h_r) + 0.1u_0}{u_0}, h_r \geq H_3 \end{cases}$ | $\begin{cases} a_{3,1} = -\frac{c_{3,1}}{b_{3,1}^2}, b_{3,1} = -h_r(H_1), c_{3,1} = w_r(H_1) \\ a_{3,2} = \frac{w_r(H_2) - w_r(H_1)}{h_r(H_2) - h_r(H_1)}, b_{3,2} = w_r(H_2) - a_{3,2}h_r(H_2) \\ a_{3,3} = \frac{w_r(H_3) - w_r(H_2)}{h_r(H_3) - h_r(H_2)}, b_{3,3} = w_r(H_2) - a_{3,3}h_r(H_2) \\ a_{3,4} = \frac{w_r(H_3)}{\exp(b_{3,4}h_r(H_3))}, b_{3,4} = -0.1 \end{cases}$ |

---


$$\begin{aligned}
& w_r(h_r) \\
\text{windward at} & \\
\text{middle} & = \begin{cases} a_{4,1}(h_r + b_{4,1})^2 + c_{4,1}, & 0 \leq h_r \leq H_1 \\ a_{4,2}h_r + b_{4,2}, & H_1 \leq h_r \leq H_2 \\ a_{4,3}(h_r + b_{4,3})^2 + c_{4,3}, & H_2 \leq h_r \leq H_3 \\ w_r(H_3), & h_r \geq H_3 \end{cases}
\end{aligned}
\quad \left\{ \begin{aligned} a_{4,1} &= -\frac{c_{4,1}}{b_{4,1}^2}, b_{4,1} = -h_r(H_1), c_{4,1} = w_r(H_1) \\ a_{4,2} &= \frac{w_r(H_2) - w_r(H_1)}{h_r(H_2) - h_r(H_1)}, b_{4,2} = w_r(H_2) - a_{4,2}h_r(H_2) \\ a_{4,3} &= \frac{v_r(H_3) - c_{4,3}}{(h_r(H_3) + b_{4,3})^2}, b_{4,3} = -h_r(H_2), c_{4,3} = w_r(H_2) \\ a_{4,4} &= w_r(H_3) \end{aligned} \right.$$


---

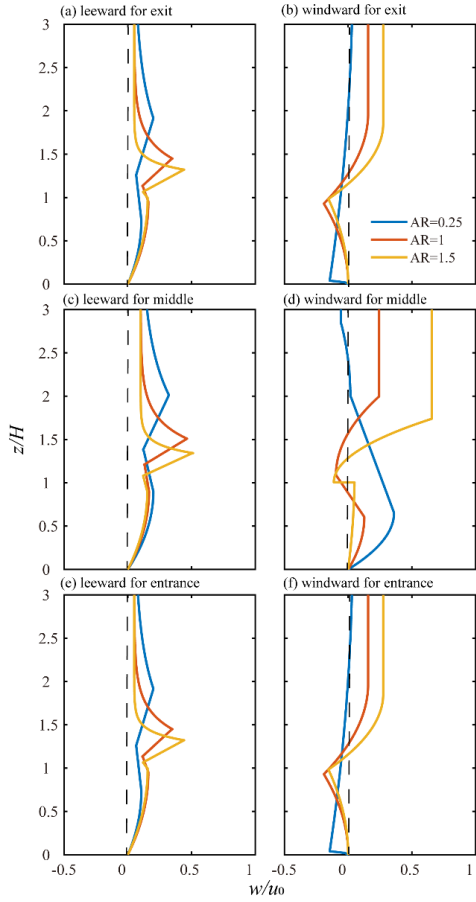

15 **Figure S1** Wind profile of  $w$  component obtained from IWSUS for perpendicular scenarios at different positions with AR= 0.25, 1 and 1.5.

## 2. Piecewise fitting of parallel scenarios

The endpoints and expressions of component  $u$  vertical profile in parallel scenarios are shown from Table S4 to Table S6.

- 20 Figure S2 shows the vertical profile of  $w$  components from IWSUS. For  $v$  component, the results are shown from Table S7 to Table S9 and Figure S3. For  $w$  components, the results are shown from Table S10 to Table S12 and Figure S4.

**Table S4 The fitting functions of the segmentation points for the wind components  $u$  in the parallel scenarios**

| Positions        | Segmentation Points | Fitting Functions                      |
|------------------|---------------------|----------------------------------------|
| Leeward/windward | H <sub>1</sub>      | $h_r = 0.7662 \exp(-3.718AR) + 0.0975$ |
| at entrance      | H <sub>2</sub>      | $h_r = 1$                              |
| Leeward/windward | H <sub>1</sub>      | $h_r = 1$                              |
| at middle        |                     |                                        |
| Leeward/windward | H <sub>1</sub>      | $h_r = 1$                              |
| at exit          |                     |                                        |

25 **Table S5 The fitting functions of the wind components  $u$  at the segmentation points (H<sub>i</sub>) in the parallel scenarios**

| Positions       | Segmentation Points | Fitting Functions                                                                                   |
|-----------------|---------------------|-----------------------------------------------------------------------------------------------------|
| windward at     | H <sub>1</sub>      | $u_r = \begin{cases} 0.7662 \exp(-3.718AR) + 0.0975, AR \leq 1 \\ u_r(AR = 1), AR > 1 \end{cases}$  |
| entrance        | H <sub>2</sub>      |                                                                                                     |
| windward at     |                     | $u_r = 0.02603 \exp(-3.252AR) + 0.009276$                                                           |
| middle          | H <sub>1</sub>      | $u_r = -0.04175 \exp(-9.374AR) + 0.02567$                                                           |
| windward at     |                     |                                                                                                     |
| exit            | H <sub>1</sub>      | $u_r = -0.04175 \exp(-9.374AR) + 0.02567$                                                           |
| leeward at      | H <sub>1</sub>      | $u_r = \begin{cases} -0.7662 \exp(-3.718AR) - 0.0975, AR \leq 1 \\ u_r(AR = 1), AR > 1 \end{cases}$ |
| entrance        | H <sub>2</sub>      |                                                                                                     |
| leeward at      |                     | $u_r = -0.02603 \exp(-3.252AR) - 0.009276$                                                          |
| middle          | H <sub>1</sub>      | $u_r = 0.04175 \exp(-9.374AR) - 0.02567$                                                            |
| leeward at exit | H <sub>1</sub>      | $u_r = 0.04175 \exp(-9.374AR) - 0.02567$                                                            |

**Table S6 Expressions of  $u$  component vertical profile for parallel scenarios, where the functional relations between  $u_r$  and  $h_r$  and determine functions of coefficients in these expressions are listed. The  $H_i$  and  $u_r(H_i)$  represents the relative height and relative wind components speed at the endpoints determined by Table S4 and Table S5 respectively.**

| Positions            | Wind profile Functions                                                                                                                                                                    | Formula for Coefficients in Wind profile Functions                                                                                                                                                                                           |
|----------------------|-------------------------------------------------------------------------------------------------------------------------------------------------------------------------------------------|----------------------------------------------------------------------------------------------------------------------------------------------------------------------------------------------------------------------------------------------|
| windward at entrance | $u_r(h_r) = \begin{cases} a_{1,1}h_r, 0 \leq z \leq H_1 \\ a_{1,2}(h_r + b_{1,2})^2 + c_{1,2}, H_1 \leq h_r \leq H_2 \\ \frac{a_{1,3}\exp(b_{1,3}h_r)}{u_0}, h_r \geq H_2 \end{cases}$    | $\begin{cases} a_{1,1} = \frac{u_r(H_1)}{h_r(H_1)} \\ a_{1,2} = \frac{u_r(H_1) - c_{1,2}}{(h_r(H_1) + b_{1,2})^2}, b_{1,2} = -h_r(H_2), c_{1,2} = u_r(H_2) \\ a_{1,3} = \frac{u_r(H_2)}{\exp(b_{1,3}h_r(H_2))}, b_{1,3} = -0.05 \end{cases}$ |
| windward at middle   | $u_r(h_r) = \begin{cases} a_{2,1}(h_r + b_{2,1})^2 + c_{2,1}, 0 \leq h_r \leq H_1 \\ \frac{a_{2,2}\exp(b_{2,2}h_r)}{v_0}, h_r \geq H_1 \end{cases}$                                       | $\begin{cases} a_{2,1} = -\frac{c_{2,1}}{b_{2,1}^2}, b_{2,1} = -h_r(H_1), c_{2,1} = u_r(H_1) \\ a_{2,2} = \frac{u_r(H_1)}{\exp(b_{2,2}h_r(H_2))}, b_{2,2} = -0.05 \end{cases}$                                                               |
| windward at exit     | $u_r(h_r) = \begin{cases} 0.66(a_{3,1}(h_r + b_{3,1})^2 + c_{3,1}), 0 \leq h_r \leq H_1 \\ \frac{0.66a_{3,2}\exp(b_{3,2}h_r)}{v_0}, h_r \geq H_1 \end{cases}$                             | $\begin{cases} a_{3,1} = -\frac{c_{3,1}}{b_{3,1}^2}, b_{3,1} = -h_r(H_1), c_{3,1} = u_r(H_1) \\ a_{3,2} = \frac{u_r(H_1)}{\exp(b_{3,2}h_r(H_1))}, b_{3,2} = -0.05 \end{cases}$                                                               |
| leeward at entrance  | $u_r(h_r) = \begin{cases} -a_{4,1}h_r, 0 \leq z \leq H_1 \\ -a_{4,2}(h_r + b_{4,2})^2 - c_{4,2}, H_1 \leq h_r \leq H_2 \\ -\frac{a_{4,3}\exp(b_{4,3}h_r)}{u_0}, h_r \geq H_2 \end{cases}$ | $\begin{cases} a_{4,1} = \frac{u_r(H_1)}{h_r(H_1)} \\ a_{4,2} = \frac{u_r(H_1) - c_{4,2}}{(h_r(H_1) + b_{4,2})^2}, b_{4,2} = -h_r(H_2), c_{4,2} = u_r(H_2) \\ a_{4,3} = \frac{u_r(H_2)}{\exp(b_{4,3}h_r(H_2))}, b_{4,3} = -0.05 \end{cases}$ |
| leeward at middle    | $u_r(h_r) = \begin{cases} -a_{5,1}(h_r + b_{5,1})^2 - c_{5,1}, 0 \leq h_r \leq H_1 \\ -\frac{a_{5,2}\exp(b_{5,2}h_r)}{v_0}, h_r \geq H_1 \end{cases}$                                     | $\begin{cases} a_{5,1} = -\frac{c_{5,1}}{b_{5,1}^2}, b_{5,1} = -h_r(H_1), c_{5,1} = u_r(H_1) \\ a_{5,2} = \frac{u_r(H_1)}{\exp(b_{5,2}h_r(H_2))}, b_{5,2} = -0.05 \end{cases}$                                                               |
| leeward at exit      | $u_r(h_r) = \begin{cases} -0.66(a_{6,1}(h_r + b_{6,1})^2 + c_{6,1}), 0 \leq h_r \leq H_1 \\ -\frac{0.66a_{6,2}\exp(b_{6,2}h_r)}{v_0}, h_r \geq H_1 \end{cases}$                           | $\begin{cases} a_{6,1} = -\frac{c_{6,1}}{b_{6,1}^2}, b_{6,1} = -h_r(H_1), c_{6,1} = u_r(H_1) \\ a_{6,2} = \frac{u_r(H_1)}{\exp(b_{6,2}h_r(H_1))}, b_{6,2} = -0.05 \end{cases}$                                                               |

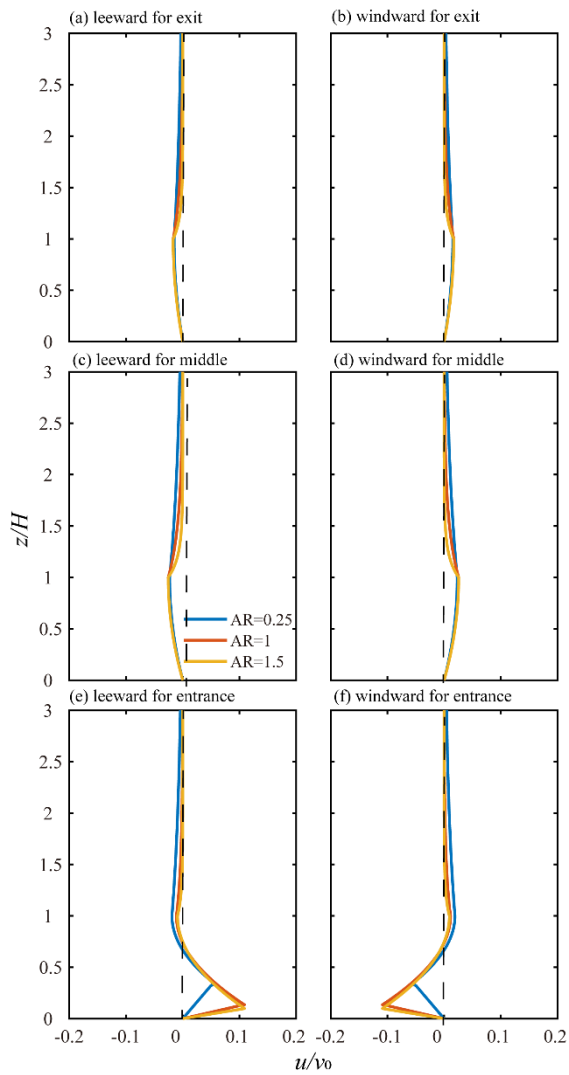

**Figure S2** Wind profile of  $u$  component obtained from IWSUS at different positions for parallel scenarios with  $AR= 0.25, 1$  and  $1.5$ .

**Table S7** The fitting functions of the segmentation points for the wind components  $v$  in the parallel scenarios

| Positions        | Segmentation Points | Fitting Functions                      |
|------------------|---------------------|----------------------------------------|
| Leeward/windward | $H_1$               | $h_r = 0.5948 \exp(-1.288AR) + 0.1745$ |
| at entrance      | $H_2$               | $h_r = 1$                              |
| Leeward/windward | $H_1$               | $h_r = 0.5948 \exp(-1.288AR) + 0.1745$ |
| at middle        | $H_2$               | $h_r = 2.206 \exp(-3.593AR) + 1.173$   |

|                  |                |                                        |
|------------------|----------------|----------------------------------------|
| Leeward/windward | H <sub>1</sub> | $h_r = 0.5948 \exp(-1.288AR) + 0.1745$ |
| at exit          | H <sub>2</sub> | $h_r = 2.206 \exp(-3.593AR) + 1.173$   |

**Table S8 The fitting functions of the wind components  $v$  at the segmentation points ( $H_i$ ) in the parallel scenarios**

| Positions        | Segmentation Points | Fitting Functions                      |
|------------------|---------------------|----------------------------------------|
| Leeward/windward | H <sub>1</sub>      | $v_r = 1.05$                           |
| at entrance      | H <sub>2</sub>      | $v_r = -0.0534 \exp(-3.028AR) + 1.102$ |
| Leeward/windward | H <sub>1</sub>      | $v_r = 0.9$                            |
| at middle        | H <sub>2</sub>      | $v_r = 2.206 \exp(-3.593AR) + 1.173$   |
| Leeward/windward | H <sub>1</sub>      | $v_r = 0.9$                            |
| at exit          | H <sub>2</sub>      | $v_r = 2.206 \exp(-3.593AR) + 1.173$   |

40

**Table S9 Expressions of  $v$  component vertical profile for parallel scenarios, where the functional relations between  $v_r$  and  $h_r$  and determine functions of coefficients in these expressions are listed. The  $H_i$  and  $v_r(H_i)$  represents the relative height and relative wind components speed at the endpoints determined by Table S7 and Table S8 respectively.**

| Positions                       | Wind profile Functions                                                                                                                                                                                                   | Formula for Coefficients in Wind profile Functions                                                                                                                                                                                                     |
|---------------------------------|--------------------------------------------------------------------------------------------------------------------------------------------------------------------------------------------------------------------------|--------------------------------------------------------------------------------------------------------------------------------------------------------------------------------------------------------------------------------------------------------|
| Leeward/windward<br>at entrance | $v_r(h_r) = \begin{cases} \frac{a_{1,1}}{\ln(h_r+1)}, 0 \leq h_r \leq H_1 \\ a_{1,2}h_r + b_{1,2}, H_1 \leq h_r \leq H_2 \\ \frac{a_{1,3}\exp(b_{1,3}h_r) + v_0}{v_0}, h_r \geq H_2 \end{cases}$                         | $\begin{cases} a_{1,1} = \frac{v_r(H_1)}{\ln(h_r(H_1) + 1)} \\ a_{1,2} = \frac{v_r(H_2) - v_r(H_1)}{h_r(H_2) - h_r(H_1)}, b_{1,2} = v_r(H_2) - a_{1,2}h_r(H_2) \\ a_{1,3} = \frac{v_r(H_3) - v_0}{\exp(b_{1,3}h_r(H_3))}, b_{1,3} = -0.05 \end{cases}$ |
| Leeward/windward<br>at middle   | $v_r(h_r) = \begin{cases} \frac{a_{2,1}}{\ln(h_r+1)}, 0 \leq h_r \leq H_1 \\ a_{2,2}h_r + b_{2,2}, H_1 \leq h_r \leq H_2 \\ \frac{a_{2,3}\exp(b_{2,3}h_r) + v_0}{v_0}, h_r \geq H_2 \end{cases}$                         | $\begin{cases} a_{2,1} = \frac{v_r(H_1)}{\ln(h_r(H_1) + 1)} \\ a_{2,2} = \frac{v_r(H_2) - v_r(H_1)}{h_r(H_2) - h_r(H_1)}, b_{2,2} = v_r(H_2) - a_{2,2}h_r(H_2) \\ a_{2,3} = \frac{v_r(H_3) - v_0}{\exp(b_{2,3}h_r(H_3))}, b_{2,3} = -0.05 \end{cases}$ |
| Leeward/windward<br>at exit     | $v_r(h_r) = \begin{cases} \frac{0.9a_{3,1}}{\ln(h_r+1)}, 0 \leq h_r \leq H_1 \\ 0.9(a_{3,2}h_r + b_{3,2}), H_1 \leq h_r \leq H_2 \\ 0.9\left(\frac{a_{3,3}\exp(b_{3,3}h_r) + v_0}{v_0}\right), h_r \geq H_2 \end{cases}$ | $\begin{cases} a_{3,1} = \frac{v_r(H_1)}{\ln(h_r(H_1) + 1)} \\ a_{3,2} = \frac{v_r(H_2) - v_r(H_1)}{h_r(H_2) - h_r(H_1)}, b_{3,2} = v_r(H_2) - a_{3,2}h_r(H_2) \\ a_{3,3} = \frac{v_r(H_3) - v_0}{\exp(b_{3,3}h_r(H_3))}, b_{3,3} = -0.05 \end{cases}$ |

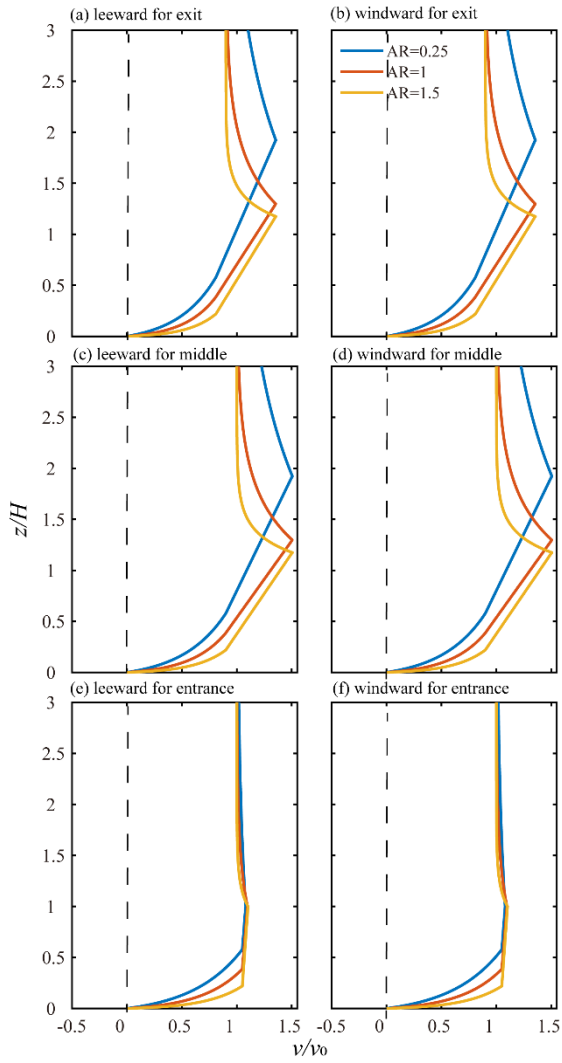

**Figure S3** Wind profile of  $v$  component obtained from IWSUS at different positions for parallel scenarios with  $AR= 0.25, 1$  and  $1.5$ .

**Table S10** The fitting functions of the segmentation points for the wind components  $w$  in the parallel scenarios

| Positions                       | Endpoints | fitting function                       |
|---------------------------------|-----------|----------------------------------------|
| Leeward/windward<br>at entrance | $H_1$     | $h_r = 1$                              |
| Leeward/windward<br>at middle   | $H_1$     | $h_r = 1.222 \exp(-3.644AR) + 0.02068$ |
|                                 | $H_2$     | $h_r = 1$                              |
|                                 | $H_1$     | $h_r = 1.222 \exp(-3.644AR) + 0.02068$ |



|                             |       |           |
|-----------------------------|-------|-----------|
| Leeward/windward<br>at exit | $H_2$ | $h_r = 1$ |
|-----------------------------|-------|-----------|

50 **Table S11 The fitting functions of the wind components  $w$  at the  $H_i$  positions in the parallel scenarios**

| Positions                       | Endpoints | fitting function                                                                                                 |
|---------------------------------|-----------|------------------------------------------------------------------------------------------------------------------|
| Leeward/windward<br>at entrance | $H_1$     | $w_r = -0.1621 \exp(-1.648AR) + 0.156$                                                                           |
| Leeward/windward<br>at middle   | $H_1$     | $w_r = \begin{cases} -0.05433AR + 0.003, AR < 0.5 \\ -0.0484 \exp(-0.8592AR) + 0.00731, AR \geq 0.5 \end{cases}$ |
|                                 | $H_2$     | $w_r = \begin{cases} w_r(AR = 0.5), AR < 0.5 \\ -1.034 \exp(-0.0328AR) + 1.025, AR \geq 0.5 \end{cases}$         |
| Leeward/windward<br>at exit     | $H_1$     | $w_r = \begin{cases} -0.05433AR + 0.003, AR < 0.5 \\ -0.0484 \exp(-0.8592AR) + 0.00731, AR \geq 0.5 \end{cases}$ |
|                                 | $H_2$     | $w_r = \begin{cases} w_r(AR = 0.5), AR < 0.5 \\ -1.034 \exp(-0.0328AR) + 1.025, AR \geq 0.5 \end{cases}$         |

55 **Table S12 Expressions of  $w$  component vertical profile for perpendicular scenarios, where the functional relations between  $w_r$  and  $h_r$  and determine functions of coefficients in these expressions are listed. The  $H_i$  and  $w_r(H_i)$  represents the relative height and relative wind components speed at the endpoints determined by Table S10 and Table S11 respectively.**

| Positions                       | Wind profile Functions                                                                                                                                                                                                                                  | Formula for Coefficients in Wind profile Functions                                                                                                                                                                |
|---------------------------------|---------------------------------------------------------------------------------------------------------------------------------------------------------------------------------------------------------------------------------------------------------|-------------------------------------------------------------------------------------------------------------------------------------------------------------------------------------------------------------------|
| Leeward/windward<br>at entrance | $w_r(h_r)$<br>$= \begin{cases} a_{1,1}(h_r + b_{1,1})^2 + c_{1,1}, 0 \leq h_r \leq H_1 \\ a_{1,2}h_r + b_{1,2}, H_1 \leq h_r \leq H_2 \\ a_{1,3}h_r + b_{1,3}, H_2 \leq h_r \leq H_3 \\ \frac{a_{1,4} \exp(b_{1,4}h_r)}{u_0}, h_r \geq H_3 \end{cases}$ | $\begin{cases} a_{1,1} = -\frac{c_{1,1}}{b_{1,1}^2}, b_{1,1} = -h_r(H_1), c_{1,1} = w_r(H_1) \\ a_{1,2} = \frac{w_r(H_1)}{\exp(b_{1,2}h_r(H_1))}, b_{1,2} = -0.05 \end{cases}$                                    |
| Leeward/windward<br>at middle   | $w_r(h_r)$<br>$= \begin{cases} a_{2,1}(h_r + b_{2,1})^2 + c_{2,1}, 0 \leq h_r \leq H_1 \\ a_{2,2}(h_r + b_{2,2})^2 + c_{2,2}, H_1 \leq h_r \leq H_2 \\ w_r(H_2), h_r \geq H_2 \end{cases}$                                                              | $\begin{cases} a_{2,1} = -\frac{c_{2,1}}{b_{2,1}^2}, b_{2,1} = -h_r(H_1), c_{2,1} = w_r(H_1) \\ a_{2,2} = \frac{w_r(H_1) - c_{2,2}}{(h_r(H_1) + b_{2,2})^2}, b_{2,2} = -h_r(H_2), c_{2,2} = w_r(H_2) \end{cases}$ |
| Leeward/windward<br>at exit     | $w_r(h_r)$<br>$= \begin{cases} 0.7a_{3,1}(h_r + b_{3,1})^2 + c_{3,1}, 0 \leq h_r \leq H_1 \\ 0.7a_{3,2}(h_r + b_{3,2})^2 + c_{3,2}, H_1 \leq h_r \leq H_2 \\ 0.7w_r(H_2), h_r \geq H_2 \end{cases}$                                                     | $\begin{cases} a_{3,1} = -\frac{c_{3,1}}{b_{3,1}^2}, b_{3,1} = -h_r(H_1), c_{3,1} = w_r(H_1) \\ a_{3,2} = \frac{w_r(H_1) - c_{3,2}}{(h_r(H_1) + b_{3,2})^2}, b_{3,2} = -h_r(H_2), c_{3,2} = w_r(H_2) \end{cases}$ |

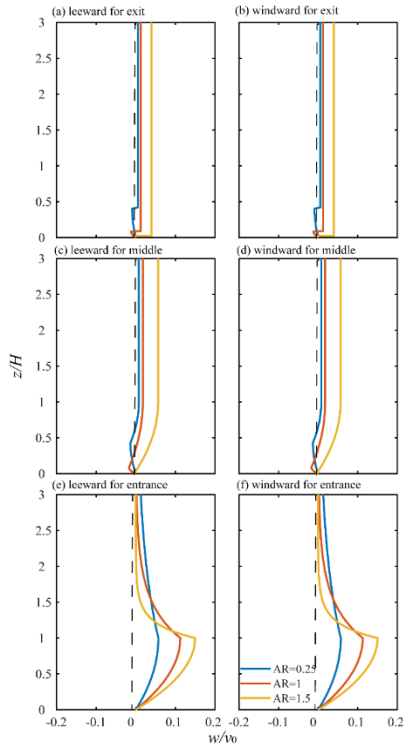

**Figure S4** Wind profile of  $w$  component obtained from IWSUS at different positions for parallel scenarios with  $AR= 0.25, 1$  and  $1.5$ .
